# Supplementary material for: Activation of Intact Bacteria and Bacterial Fragments Mixed withAgar as Cloud Droplets and Ice Crystals in Cloud ChamberExperiments
Source: Copernicus journal article supplement (doi:10.5194/acp-2018-594), 2018-06-20
Supplement: Supplementary file 1 [file acp-2018-594-supplement.pdf]

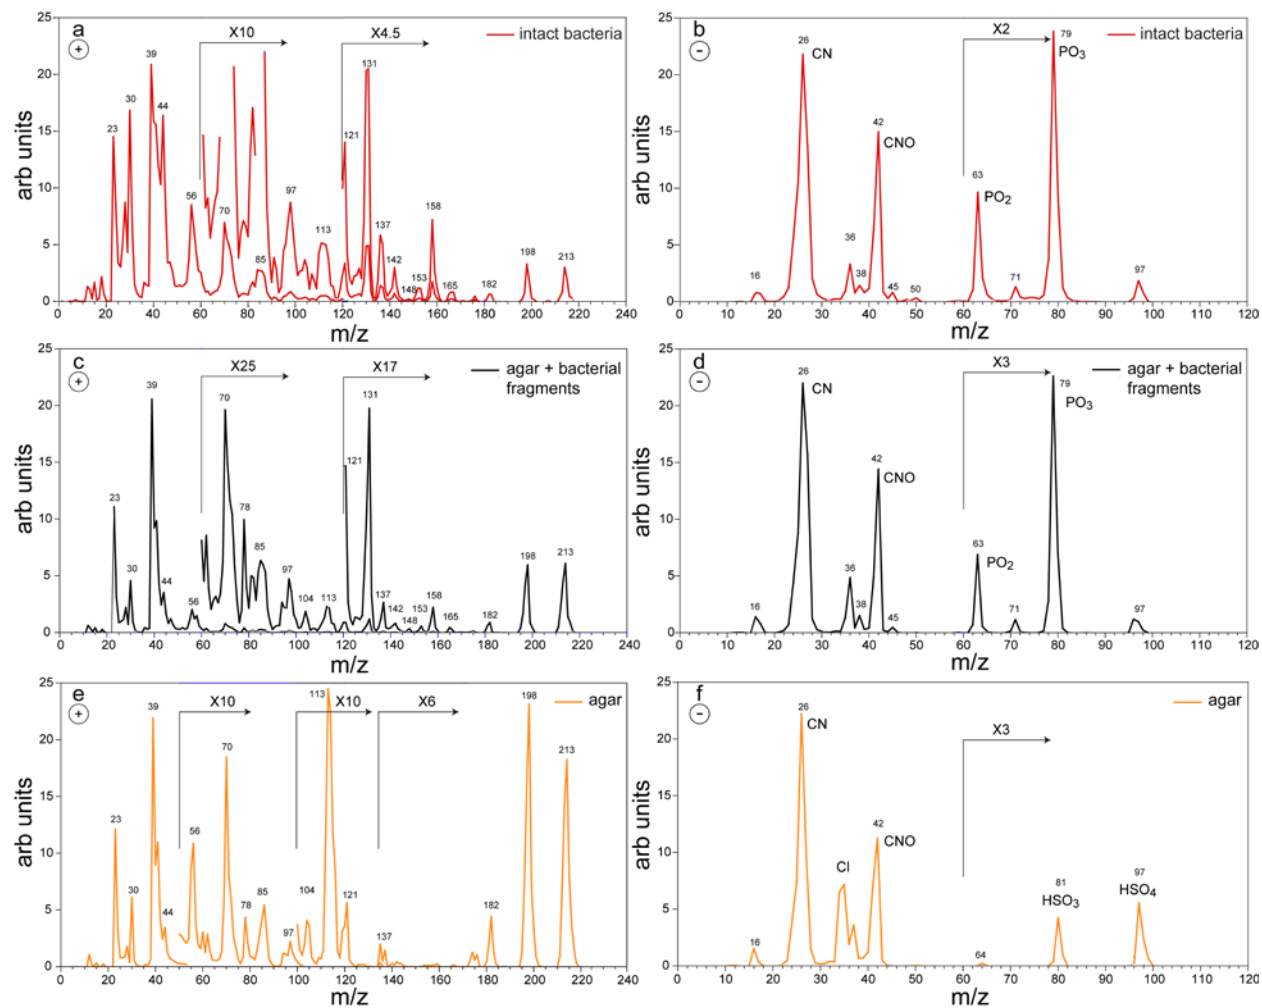

**Figure S1: Positive (a) and negative (b) MS of intact *Pseudomonas syringae* bacteria measured before Expansion 1; Positive (c) and negative (d) MS of the small particles mode, measured before Expansion 1; Positive (e) and negative (f) MS of pure agar particles measured in a separate experiment.**

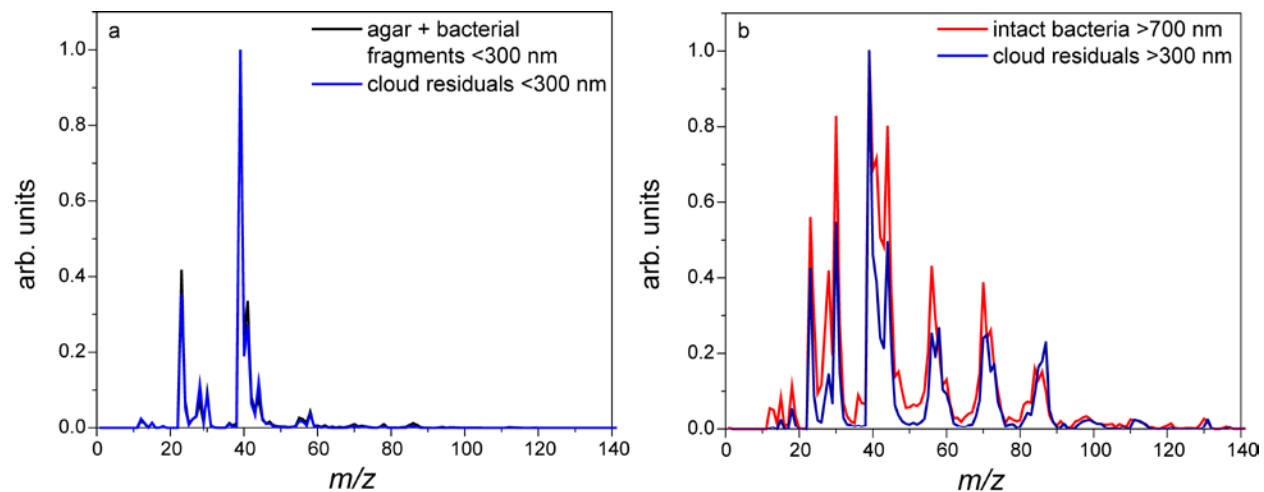

**Figure S2: (a) Comparison between the MS of cloud residuals smaller than 300 nm and the reference MS of the small particle mode ( $d_{va} < 300$  nm); (b) Comparison between the MS of cloud residuals larger than 300 nm and the MS of intact bacteria ( $d_{va} > 700$  nm).**
